# Supplementary material for: High-performance organic thin-film transistors with polymer-blended small-molecular semiconductor films, fabricated using a pre-metered coating process
Source: Royal Society of Chemistry journal article supplement (doi:10.1039/c2jm16007b), 2012-01-01
Supplement: c2jm16007b.pdf [file c2jm16007b.pdf]

# High-performance organic thin-film transistors with polymer-blended small-molecular semiconductor films, fabricated using a pre-metered coating process

Byoungchoo Park,<sup>\*1</sup> Hong Goo Jeon,<sup>1</sup> Jinsung Choi,<sup>1</sup> Y. K. Kim,<sup>1</sup> Jongsun Lim,<sup>2</sup> Junyoung Jung,<sup>2</sup> Song Yun Cho<sup>2</sup> and Changjin Lee<sup>2</sup>

<sup>1</sup>Department of Electrophysics, Kwangwoon University, Seoul 139-701, Korea. Fax: 82 2943 3208; Tel: 82 2940 5237; E-mail: bcpark@kw.ac.kr

<sup>2</sup>Advanced Materials Division, Korea Research Institute of Chemical Technology, Yuseong-gu, Daejeon, 305-600, (Korea)

10

## ATM topographic Images

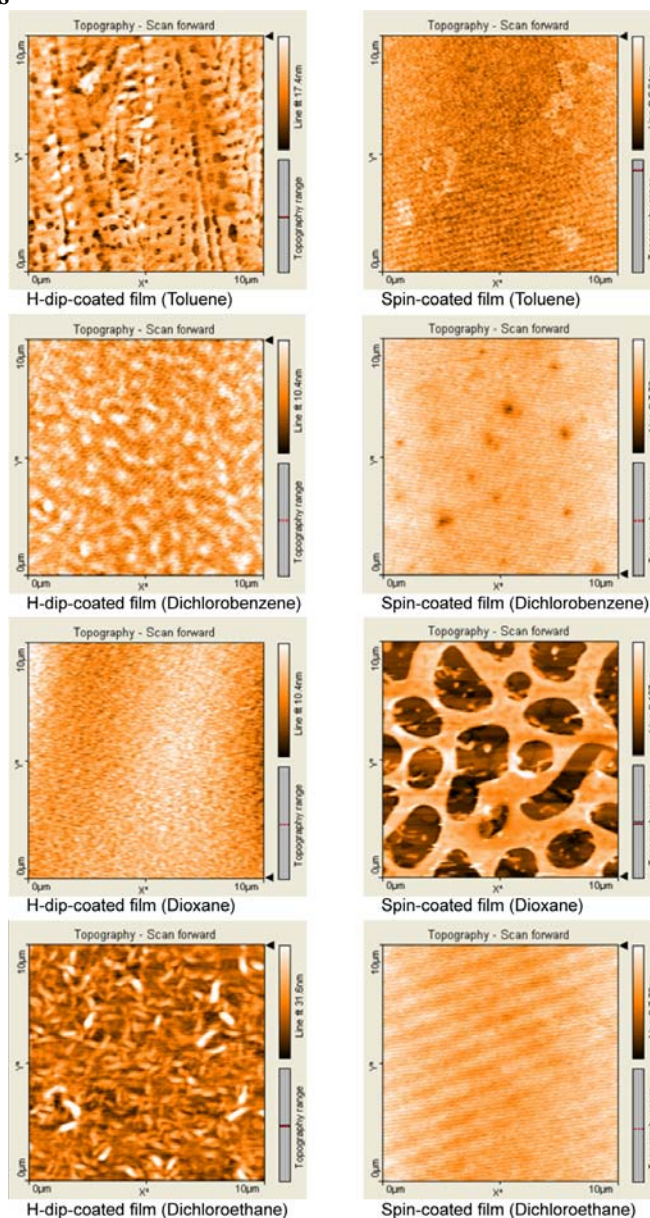

Fig.S1 The AFM topographic images showing the microscopic textures of the H-dip- (left) and spin- (right) coated TIPS-PEN:PaMS films for the four solvents used.

15

### *Polarised microscopic Images*

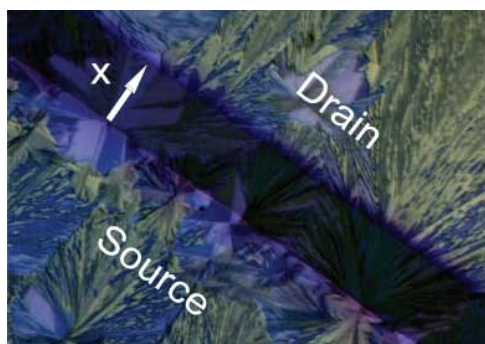

H-dip-coated film (Toluene)

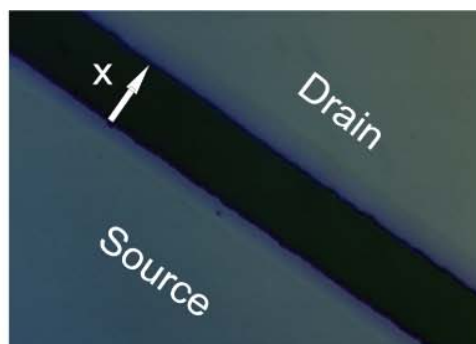

Spin-coated film (Toluene)

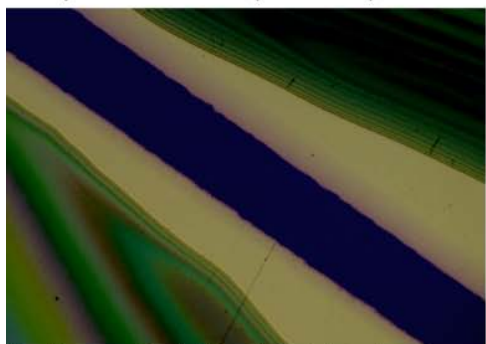

H-dip-coated film (Dichlorobenzene)

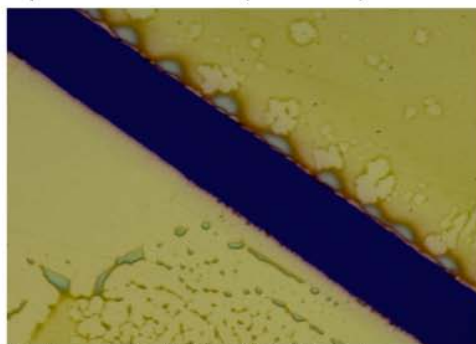

Spin-coated film (Dichlorobenzene)

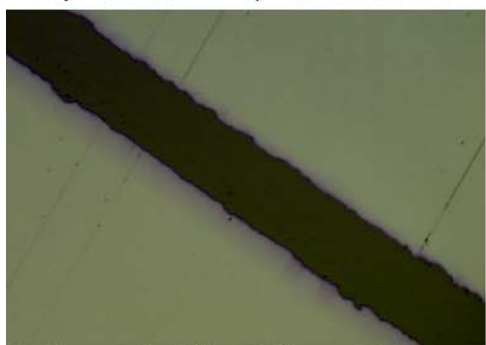

H-dip-coated film (Dioxane)

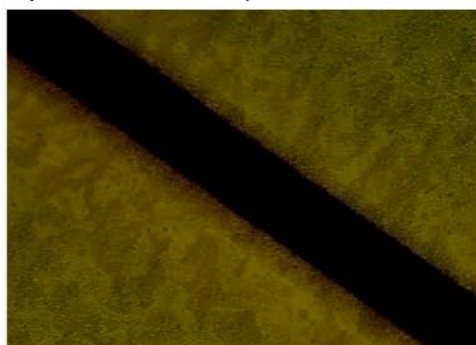

Spin-coated film (Dioxane)

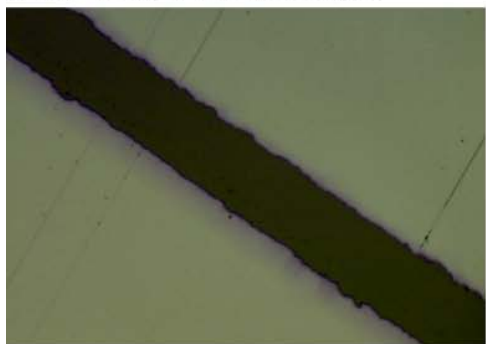

H-dip-coated film (Dichloroethane)

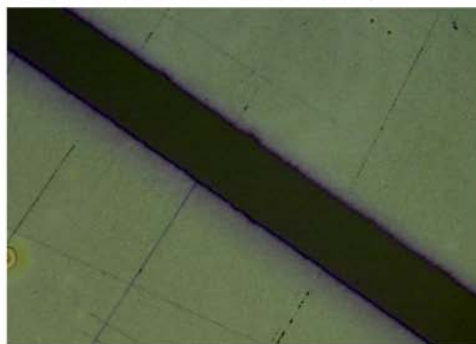

Spin-coated film (Dichloroethane)

Fig.S2 Polarised images showing the microscopic textures of the H-dip- (left) and spin- (right) coated TIPS-PEN:PaMS films for the four solvents used.

Table S1. Summary of the dependence of the electrical performance of the fabricated TIPS-PEN:PaMS OTFTs on the solvent used.

| <i>Parameter</i>                                                    | <i>Solvent (H-dip / Spin)</i>             |                                           |                                           |                                         |
|---------------------------------------------------------------------|-------------------------------------------|-------------------------------------------|-------------------------------------------|-----------------------------------------|
|                                                                     | <i>Toluene</i>                            | <i>Dichlorobenzene</i>                    | <i>Dichloroethane</i>                     | <i>Dioxane</i>                          |
| Thickness (nm)                                                      | 80 / 67                                   | 70 / 62                                   | 67 / 66                                   | 87 / 73                                 |
| Roughness (nm)                                                      | 2.7 / 0.9                                 | 1.2 / 0.6                                 | 3.8 / 0.6                                 | 1.2 / 29.97                             |
| Avg. mobility<br>(cm <sup>2</sup> V <sup>-1</sup> s <sup>-1</sup> ) | 0.1552±0.0182 /<br>0.0062±0.0003          | 0.0302±0.0097 /<br>0.0000±0.0000*         | 0.0126±0.0016 /<br>0.0000±0.0000*         | 0.0035±0.0021 /<br>0.0000±0.0000*       |
| Max. mobility<br>(cm <sup>2</sup> V <sup>-1</sup> s <sup>-1</sup> ) | 0.2220 / 0.0120                           | 0.0470 / 0.0007                           | 0.0140 / 0.0003                           | 0.0020 / 0.0003                         |
| On/Off ratio                                                        | 1.6×10 <sup>5</sup> / 1.5×10 <sup>4</sup> | 2.8×10 <sup>4</sup> / 3.4×10 <sup>2</sup> | 4.6×10 <sup>4</sup> / 4.7×10 <sup>1</sup> | 7.9×10 <sup>2</sup> / 2×10 <sup>2</sup> |
| Thresholds<br>(V)                                                   | -21.3/-27.9                               | -5.0 / 15.2                               | -15.2 / 4.1                               | -20.8 / -27.0                           |

\*: The values of the average and the standard deviation are lower than 1×10<sup>-4</sup>.
